# Supplementary material for: More than one in three proxies do not know their loved one’s current code status: An observational study in a Maryland ICU
Source: PLOS journal article supplement (doi:10.1371/journal.pone.0211531), 2019-01-30
Supplement: S1 (10.1371/journal.pone.0211531.s001) [file journal.pone.0211531.s001]

# Figure S1

## PAB-Pilot Form 3: Family Interview

Subject ID - 2 \_\_\_\_\_

Data collector Initials \_\_\_\_\_

Date: \_\_\_\_\_

21. How do you think [patient's name] would describe his/her main goal right now?

---

---

---

22. In your opinion, which one of the following options best describes [patient's name] goal right now?

- |                                            |                                                                                             |
|--------------------------------------------|---------------------------------------------------------------------------------------------|
| <input type="checkbox"/> To be cured       | <input type="checkbox"/> To live longer                                                     |
| <input type="checkbox"/> To improve health | <input type="checkbox"/> To maintain health                                                 |
| <input type="checkbox"/> To be comfortable | <input type="checkbox"/> To accomplish a particular personal life goal (ex. wedding, birth) |
| <input type="checkbox"/> Unsure            | <input type="checkbox"/> Refused                                                            |

23. In your opinion, how does [name] want doctors and nurses in the ICU to treat him/her? Which of the following statements sounds most like what [name] would say? (choose 1)

- ☐<sub>1</sub> Use life-support machines to keep me alive no matter what. If my heart stops, do CPR.
- ☐<sub>2</sub> Use life-support machines to keep me alive no matter what, but if my heart stops don't do CPR.
- ☐<sub>3</sub> Try to help me get better, but don't use life support machines and if my heart stops don't do CPR.
- ☐<sub>4</sub> Focus on keeping me as comfortable as possible, even if that means I die sooner.
- ☐<sub>5</sub> I don't know what he/she would say. ☐<sub>6</sub> Refused

24. Is [name] on life-support right now?

- ☐<sub>1</sub> Yes ☐<sub>0</sub> No ☐<sub>2</sub> Unsure ☐<sub>3</sub> Refused

25. [ONLY if answer to question 24 if "Yes"]: Which of the following best describes how doctors and nurses in the ICU are treating [name] right now? (choose 1)

- ☐<sub>1</sub> They're using life-support machines to keep him/her alive. If his/her heart stops they'll do CPR.
- ☐<sub>2</sub> They're using life-support machines to keep him/her alive, but if his/her heart stops they won't do CPR.
- ☐<sub>3</sub> They're focusing on keeping him/her as comfortable as possible, even if that means he/she dies sooner.
- ☐<sub>4</sub> I don't know. ☐<sub>5</sub> Refused

26. [ONLY if answer to question 24 if "No" or "Unsure"]: Which of the following best describes how doctors and nurses in the ICU are treating [name] right now? (choose 1)

- ☐<sub>1</sub> If a life-support machine is needed they'll use it. If his/her heart stops they'll do CPR.
- ☐<sub>2</sub> If a life-support machine is needed they'll use it. But if his/her heart stops they won't do CPR.
- ☐<sub>3</sub> They're trying to help him/her get better, but they will not use life support machines and they will not do CPR if his/her heart stops.
- ☐<sub>4</sub> They're focusing on keeping him/her as comfortable as possible, even if that means he/she dies sooner.
- ☐<sub>5</sub> I don't know. ☐<sub>8</sub> Refused
